# Supplementary material for: Integrative UHPLC-HRMS and computational biology reveal ferroptosis and anoikis targeting by Wenpitongluo decoction in cardiorenal syndrome
Source: Front Chem. 2025 Jul 21;13:1617676. doi: 10.3389/fchem.2025.1617676 (PMC12319559; doi:10.3389/fchem.2025.1617676)
Supplement: Supplementary file 3 [file Table6.xlsx]

## Sheet: Sheet1
MOLID	Name	OB(%)	DL
MOL000022	14-acetyl-12-senecioyl-2E,8Z,10E-atractylentriol	63.37	0.3
MOL000033	(3S,8S,9S,10R,13R,14S,17R)-10,13-dimethyl-17-[(2R,5S)-5-propan-2-yloctan-2-yl]-2,3,4,7,8,9,11,12,14,15,16,17-dodecahydro-1H-cyclopenta[a]phenanthren-3-ol	36.23	0.78
MOL000049	3β-acetoxyatractylone	54.07	0.22
MOL000072	8β-ethoxy atractylenolide Ⅲ	35.95	0.21
MOL001002	ellagic acid	43.06	0.43
MOL001918	paeoniflorgenone	87.59	0.37
MOL001924	paeoniflorin	53.87	0.79
MOL002714	baicalein	33.52	0.21
MOL000358	beta-sitosterol	36.91	0.75
MOL000359	sitosterol	36.91	0.75
MOL004355	Spinasterol	42.98	0.76
MOL000449	Stigmasterol	43.83	0.76
MOL000492	(+)-catechin	54.83	0.24
MOL006992	(2R,3R)-4-methoxyl-distylin	59.98	0.3
MOL006999	stigmast-7-en-3-ol	37.42	0.75
MOL002883	Ethyl oleate (NF)	32.4	0.19
MOL005043	campest-5-en-3beta-ol	37.58	0.71
MOL000011	(2R,3R)-3-(4-hydroxy-3-methoxy-phenyl)-5-methoxy-2-methylol-2,3-dihydropyrano[5,6-h][1,4]benzodioxin-9-one	68.83	0.66
MOL011730	11-hydroxy-sec-o-beta-d-glucosylhamaudol_qt	50.24	0.27
MOL011732	anomalin	59.65	0.66
MOL011737	divaricatacid	87	0.32
MOL011740	divaricatol	31.65	0.38
MOL001941	Ammidin	34.55	0.22
MOL011747	ledebouriellol	32.05	0.51
MOL011749	phelloptorin	43.39	0.28
MOL002644	Phellopterin	40.19	0.28
MOL000173	wogonin	36.91	0.75
MOL001494	Mandenol	30.68	0.23
MOL001942	isoimperatorin	36.91	0.75
MOL003588	Prangenidin	42	0.19
MOL007514	methyl icosa-11,14-dienoate	45.46	0.23
MOL013077	Decursin	36.31	0.22
MOL001418	galeopsin	39.67	0.23
MOL001420	ZINC04073977	39.27	0.38
MOL001421	preleoheterin	61.02	0.38
MOL001422	iso-preleoheterin	38	0.76
MOL000098	quercetin	85.97	0.33
MOL001439	arachidonic acid	66.29	0.33
MOL000354	isorhamnetin	46.43	0.28
MOL000422	kaempferol	45.57	0.2
MOL001484	Inermine	49.6	0.31
MOL001792	DFV	41.88	0.24
MOL000211	Mairin	75.18	0.54
MOL002311	Glycyrol	32.76	0.18
MOL000239	Jaranol	55.38	0.78
MOL002565	Medicarpin	90.78	0.67
MOL003656	Lupiwighteone	50.83	0.29
MOL003896	7-Methoxy-2-methyl isoflavone	49.22	0.34
MOL000392	formononetin	49.6	0.31
MOL000417	Calycosin	36.91	0.75
MOL004328	naringenin	51.64	0.37
MOL004805	(2S)-2-[4-hydroxy-3-(3-methylbut-2-enyl)phenyl]-8,8-dimethyl-2,3-dihydropyrano[2,3-f]chromen-4-one	42.56	0.2
MOL004806	euchrenone	69.67	0.21
MOL004808	glyasperin B	47.75	0.24
MOL004810	glyasperin F	41.88	0.24
MOL004811	Glyasperin C	59.29	0.21
MOL004814	Isotrifoliol	31.79	0.72
MOL004815	(E)-1-(2,4-dihydroxyphenyl)-3-(2,2-dimethylchromen-6-yl)prop-2-en-1-one	30.29	0.57
MOL004820	kanzonols W	65.22	0.44
MOL004824	(2S)-6-(2,4-dihydroxyphenyl)-2-(2-hydroxypropan-2-yl)-4-methoxy-2,3-dihydrofuro[3,2-g]chromen-7-one	75.84	0.54
MOL004827	Semilicoisoflavone B	45.56	0.4
MOL004828	Glepidotin A	31.94	0.42
MOL004829	Glepidotin B	39.62	0.35
MOL004833	Phaseolinisoflavan	50.48	0.52
MOL004835	Glypallichalcone	60.25	0.63
MOL004838	8-(6-hydroxy-2-benzofuranyl)-2,2-dimethyl-5-chromenol	48.78	0.55
MOL004841	Licochalcone B	44.72	0.35
MOL004848	licochalcone G	64.46	0.34
MOL004849	3-(2,4-dihydroxyphenyl)-8-(1,1-dimethylprop-2-enyl)-7-hydroxy-5-methoxy-coumarin	32.01	0.45
MOL004855	Licoricone	61.6	0.19
MOL004856	Gancaonin A	58.44	0.38
MOL004857	Gancaonin B	76.76	0.19
MOL004863	3-(3,4-dihydroxyphenyl)-5,7-dihydroxy-8-(3-methylbut-2-enyl)chromone	49.25	0.32
MOL004864	5,7-dihydroxy-3-(4-methoxyphenyl)-8-(3-methylbut-2-enyl)chromone	59.62	0.43
MOL004866	2-(3,4-dihydroxyphenyl)-5,7-dihydroxy-6-(3-methylbut-2-enyl)chromone	63.58	0.47
MOL004879	Glycyrin	51.08	0.4
MOL004882	Licocoumarone	48.79	0.45
MOL004883	Licoisoflavone	66.37	0.41
MOL004884	Licoisoflavone B	30.49	0.41
MOL004885	licoisoflavanone	44.15	0.41
MOL004891	shinpterocarpin	52.61	0.47
MOL004898	(E)-3-[3,4-dihydroxy-5-(3-methylbut-2-enyl)phenyl]-1-(2,4-dihydroxyphenyl)prop-2-en-1-one	33.21	0.36
MOL004903	liquiritin	41.61	0.42
MOL004904	licopyranocoumarin	38.93	0.55
MOL004907	Glyzaglabrin	52.47	0.54
MOL004908	Glabridin	80.3	0.73
MOL004910	Glabranin	46.27	0.31
MOL004911	Glabrene	65.69	0.74
MOL004912	Glabrone	80.36	0.65
MOL004913	1,3-dihydroxy-9-methoxy-6-benzofurano[3,2-c]chromenone	61.07	0.35
MOL004914	1,3-dihydroxy-8,9-dimethoxy-6-benzofurano[3,2-c]chromenone	53.25	0.47
MOL004915	Eurycarpin A	52.9	0.31
MOL004924	(-)-Medicocarpin	46.27	0.44
MOL004935	Sigmoidin-B	52.51	0.5
MOL004941	(2R)-7-hydroxy-2-(4-hydroxyphenyl)chroman-4-one	48.14	0.43
MOL004945	(2S)-7-hydroxy-2-(4-hydroxyphenyl)-8-(3-methylbut-2-enyl)chroman-4-one	62.9	0.53
MOL004948	Isoglycyrol	43.28	0.37
MOL004949	Isolicoflavonol	40.99	0.95
MOL004957	HMO	34.88	0.41
MOL004959	1-Methoxyphaseollidin	71.12	0.18
MOL004961	Quercetin der.	36.57	0.32
MOL004966	3'-Hydroxy-4'-O-Methylglabridin	44.7	0.84
MOL000497	licochalcone a	45.17	0.42
MOL004974	3'-Methoxyglabridin	38.37	0.21
MOL004978	2-[(3R)-8,8-dimethyl-3,4-dihydro-2H-pyrano[6,5-f]chromen-3-yl]-5-methoxyphenol	69.98	0.64
MOL004980	Inflacoumarin A	46.45	0.33
MOL004985	icos-5-enoic acid	43.71	0.57
MOL004988	Kanzonol F	40.79	0.29
MOL004989	6-prenylated eriodictyol	46.16	0.57
MOL004990	7,2',4'-trihydroxy－5-methoxy-3－arylcoumarin	36.21	0.52
MOL004991	7-Acetoxy-2-methylisoflavone	39.71	0.33
MOL004993	8-prenylated eriodictyol	30.7	0.2
MOL004996	gadelaidic acid	32.47	0.89
MOL000500	Vestitol	39.22	0.41
MOL005000	Gancaonin G	83.71	0.27
MOL005001	Gancaonin H	38.92	0.26
MOL005003	Licoagrocarpin	53.79	0.4
MOL005007	Glyasperins M	30.7	0.2
MOL005008	Glycyrrhiza flavonol A	74.66	0.21
MOL005012	Licoagroisoflavone	60.44	0.39
MOL005016	Odoratin	50.1	0.78
MOL005017	Phaseol	58.81	0.58
MOL005018	Xambioona	72.67	0.59
MOL005020	dehydroglyasperins C	41.28	0.6
MOL001736	(-)-taxifolin	57.28	0.49
MOL000073	ent-Epicatechin	49.95	0.3
MOL011169	Peroxyergosterol	54.85	0.87
MOL000296	hederagenin	53.82	0.37
MOL000033	(3S,8S,9S,10R,13R,14S,17R)-10,13-dimethyl-17-[(2R,5S)-5-propan-2-yloctan-2-yl]-2,3,4,7,8,9,11,12,14,15,16,17-dodecahydro-1H-cyclopenta[a]phenanthren-3-ol	46.43	0.28
MOL000371	3,9-di-O-methylnissolin	60.51	0.27
MOL000378	7-O-methylisomucronulatol	36.91	0.75
MOL000379	9,10-dimethoxypterocarpan-3-O-β-D-glucoside	54.83	0.24
MOL000380	(6aR,11aR)-9,10-dimethoxy-6a,11a-dihydro-6H-benzofurano[3,2-c]chromen-3-ol	48.96	0.24
MOL000387	Bifendate	57.84	0.27
MOL000398	isoflavanone	44.39	0.82
MOL000433	FA	55.38	0.78
MOL000438	(3R)-3-(2-hydroxy-3,4-dimethoxyphenyl)chroman-7-ol	50.83	0.29
MOL000439	isomucronulatol-7,2'-di-O-glucosiole	36.91	0.75
MOL000442	1,7-Dihydroxy-3,9-dimethoxy pterocarpene	36.23	0.78
MOL000273	(2R)-2-[(3S,5R,10S,13R,14R,16R,17R)-3,16-dihydroxy-4,4,10,13,14-pentamethyl-2,3,5,6,12,15,16,17-octahydro-1H-cyclopenta[a]phenanthren-17-yl]-6-methylhept-5-enoic acid	49.6	0.31
MOL000275	trametenolic acid	53.74	0.48
MOL000279	Cerevisterol	41.72	0.69
MOL000282	ergosta-7,22E-dien-3beta-ol	74.69	0.3
MOL000283	Ergosterol peroxide	36.74	0.92
		64.26	0.42
		31.1	0.67
		69.67	0.21
		109.99	0.3
		47.75	0.24
		41.88	0.24
		68.96	0.71
		67.67	0.26
		49.28	0.62
		39.05	0.48
		46.43	0.28
		30.93	0.81
		38.71	0.8
		37.96	0.77
		43.51	0.72
		40.36	0.81
		36.91	0.75
